# Supplementary material
Source: HighWire-hosted journal article supplement (https://rmdopen.bmj.com/content/4/1/e000575)
Supplement: inline-supplementary-material-1 [file inline-supplementary-material-1.docx]

**Supplementary table: disease characteristics of the pSS patients included in the analyses**

|  | Total (N=160) |
| --- | --- |
| **Age, years** |  |
| Mean (SD) | 58.1 (16.2) |
|  |  |
| **Sex** |  |
| F | 140 (88%) |
| M | 20 (13%) |
|  |  |
| **Ethnicity** |  |
| White | 151 (94%) |
|  |  |
| **Anti-Nuclear antibody test positive** |  |
| Missing | 12 |
| No | 44 (30%) |
| Yes | 104 (70%) |
|  |  |
| **Anti-SSA (anti-Ro) test positive** |  |
| Missing | 30 |
| No | 34 (26%) |
| Yes | 96 (74%) |
|  |  |
| **Anti-SSB (anti-La) test positive** |  |
| Missing | 30 |
| No | 55 (42%) |
| Yes | 75 (58%) |
|  |  |
| **Ocular Symptoms** |  |
| No | 15 (9%) |
| Yes | 145 (91%) |
|  |  |
| **Oral symptoms** |  |
| No | 26 (16%) |
| Yes | 134 (84%) |
|  |  |
| **Histopathology positive** |  |
| Missing | 139 |
| No | 9 (43%) |
| Yes | 12 (57%) |
|  |  |
| **Met AECG criteria** |  |
| No | 130 (81%) |
| Yes | 30 (19%) |
|  |  |
